# Supplementary material for: Head-to-Head Comparison of Rapid and Automated Antigen Detection Tests for the Diagnosis of SARS-CoV-2 Infection
Source: PubMed Central journal article supplement (PMC7828347; doi:10.3390/jcm10020265), 2021-01-13
Supplement: jcm-10-00265-s001.pdf [file jcm-10-00265-s001.pdf]

**Supplemental Table 1:** Sensitivity and specificity of RAD and automated antigen tests across different range of RT-PCR Ct values. Results in grey provide results of all RT-PCR values including those with a Ct value > 25 (min-max range: 12.6 – 38.2).

| Sensitivity           |            | No. of positive patients |                         |                         |                         |                         |                         |                         |                         |
|-----------------------|------------|--------------------------|-------------------------|-------------------------|-------------------------|-------------------------|-------------------------|-------------------------|-------------------------|
| Ct range              | n          | Biotal (10 min)          | Panbio (15 min)         | Panbio (20 min)         | Healgen (15 min)        | Healgen (20 min)        | Roche (15 min)          | Roche (30 min)          | Ortho                   |
| < 15                  | 2          | 2 (100%)                 | 1 (50.0%)               | 1 (50.0%)               | 2 (100%)                | 2 (100%)                | 2 (100%)                | 2 (100%)                | 2 (100%)                |
| > 15-20               | 34         | 33 (97.1%)               | 32 (94.1%)              | 32 (94.1%)              | 33 (97.1%)              | 33 (97.1%)              | 33 (97.1%)              | 33 (97.1%)              | 34 (100%)               |
| > 20-25               | 22         | 19 (86.4%)               | 21 (95.5%)              | 21 (95.5%)              | 21 (95.5%)              | 21 (95.5%)              | 21 (95.5%)              | 21 (95.5%)              | 22 (100%)               |
| <b>Total &lt; 25†</b> | <b>58</b>  | <b>54 (93.1%)</b>        | <b>54 (93.1%)</b>       | <b>54 (93.1%)</b>       | <b>56 (96.6%)</b>       | <b>56 (96.6%)</b>       | <b>56 (96.6%)</b>       | <b>56 (96.6%)</b>       | <b>58 (100%)</b>        |
| <b>[95%CI]</b>        |            | <b>[83.3% to 98.1%]</b>  | <b>[83.3% to 98.1%]</b> | <b>[83.3% to 98.1%]</b> | <b>[88.1% to 99.6%]</b> | <b>[88.1% to 99.6%]</b> | <b>[88.1% to 99.6%]</b> | <b>[88.1% to 99.6%]</b> | <b>[93.8% to 100%]</b>  |
| > 25                  | 38         | 10 (26.3%)               | 11 (28.9%)              | 11 (28.9%)              | 14 (36.8%)              | 18 (47.4%)              | 11 (28.9%)              | 11 (28.9%)              | 22 (57.9%)              |
| <b>Total (n, %)</b>   | <b>96</b>  | <b>64 (66.7%)</b>        | <b>65 (67.7%)</b>       | <b>65 (67.7%)</b>       | <b>70 (72.9%)</b>       | <b>74 (77.1%)</b>       | <b>67 (69.8%)</b>       | <b>67 (69.8%)</b>       | <b>80 (83.3%)</b>       |
| <b>[95% CI]</b>       |            | <b>[56.3% to 76.0%]</b>  | <b>[57.4% to 76.9%]</b> | <b>[57.4% to 76.9%]</b> | <b>[62.9% to 81.5%]</b> | <b>[67.4% to 85.1%]</b> | <b>[59.6% to 78.8%]</b> | <b>[59.6% to 78.8%]</b> | <b>[74.4%- 90.2%]</b>   |
| Specificity           |            | No. of negative patients |                         |                         |                         |                         |                         |                         |                         |
| <b>Neg. RT-PCR†</b>   | <b>130</b> | <b>119 (91.5%)</b>       | <b>119 (91.5%)</b>      | <b>119 (91.5%)</b>      | <b>114 (87.7%)</b>      | <b>109 (83.9%)</b>      | <b>119 (91.5%)</b>      | <b>119 (91.5%)</b>      | <b>108 (83.1%)</b>      |
| <b>[95%CI]</b>        |            | <b>[85.4% to 95.7%]</b>  | <b>[85.4% to 95.7%]</b> | <b>[85.4% to 95.7%]</b> | <b>[80.8% to 92.8%]</b> | <b>[76.4% to 89.7%]</b> | <b>[85.4% to 95.7%]</b> | <b>[85.4% to 95.7%]</b> | <b>[75.5% to 89.1%]</b> |
| Neg. RT-PCR           | 92         | 91 (98.9%)               | 92 (100%)               | 92 (100%)               | 90 (97.8%)              | 89 (96.7%)              | 92 (100%)               | 92 (100%)               | 92 (100%)               |
| [95%CI]               |            | [94.1% to 99.9%]         | [96.1%-100%]            | [96.1%-100%]            | [92.4%-99.7%]           | [90.8%-99.3%]           | [96.1%-100%]            | [96.1%-100%]            | [96.1%-100%]            |

**Supplemental Table 2:** Sensitivity and specificity of RAD and automated antigen tests across different range of RT-PCR Ct values. Results in grey provide results of all RT-PCR values including those with a Ct value > 35 (min-max range: 12.6 – 38.2).

| Sensitivity                      |           | No. of positive patients              |                                       |                                       |                                       |                                       |                                       |                                       |                                       |
|----------------------------------|-----------|---------------------------------------|---------------------------------------|---------------------------------------|---------------------------------------|---------------------------------------|---------------------------------------|---------------------------------------|---------------------------------------|
| Ct range                         | n         | Biotal (10 min)                       | Panbio (15 min)                       | Panbio (20 min)                       | Healgen (15 min)                      | Healgen (20 min)                      | Roche (15 min)                        | Roche (30 min)                        | Ortho                                 |
| < 15                             | 2         | 2 (100%)                              | 1 (50.0%)                             | 1 (50.0%)                             | 2 (100%)                              | 2 (100%)                              | 2 (100%)                              | 2 (100%)                              | 2 (100%)                              |
| > 15-20                          | 34        | 33 (97.1%)                            | 32 (94.1%)                            | 32 (94.1%)                            | 33 (97.1%)                            | 33 (97.1%)                            | 33 (97.1%)                            | 33 (97.1%)                            | 34 (100%)                             |
| > 20-25                          | 22        | 19 (86.4%)                            | 21 (95.5%)                            | 21 (95.5%)                            | 21 (95.5%)                            | 21 (95.5%)                            | 21 (95.5%)                            | 21 (95.5%)                            | 22 (100%)                             |
| > 25-30                          | 19        | 6 (31.6%)                             | 10 (52.6%)                            | 10 (52.6%)                            | 11 (57.9%)                            | 13 (68.4%)                            | 10 (52.6%)                            | 10 (52.6%)                            | 19 (100%)                             |
| > 30-35                          | 6         | 2 (33.3%)                             | 0 (0.0%)                              | 0 (0.0%)                              | 2 (33.3%)                             | 2 (33.3%)                             | 0 (0.00%)                             | 0 (0.0%)                              | 3 (50.0%)                             |
| <b>Total &lt; 35†</b><br>[95%CI] | <b>83</b> | <b>62 (74.7%)</b><br>[64.0% to 83.6%] | <b>64 (77.1%)</b><br>[66.6% to 85.6%] | <b>64 (77.1%)</b><br>[66.6% to 85.6%] | <b>69 (83.1%)</b><br>[73.3% to 90.5%] | <b>71 (85.5%)</b><br>[76.1% to 92.3%] | <b>66 (79.5%)</b><br>[69.2% to 87.6%] | <b>66 (79.5%)</b><br>[69.2% to 87.6%] | <b>80 (96.4%)</b><br>[89.8% to 99.3%] |
| > 35                             | 13        | 2 (15.4%)                             | 1 (7.7%)                              | 1 (7.7%)                              | 1 (7.7%)                              | 3 (23.3%)                             | 1 (7.7%)                              | 1 (7.7%)                              | 0 (0.0%)                              |
| <b>Total (n, %)</b><br>[95% CI]  | <b>96</b> | <b>64 (66.7%)</b><br>[56.3% to 76.0%] | <b>65 (67.7%)</b><br>[57.4% to 76.9%] | <b>65 (67.7%)</b><br>[57.4% to 76.9%] | <b>70 (72.9%)</b><br>[62.9% to 81.5%] | <b>74 (77.1%)</b><br>[67.4% to 85.1%] | <b>67 (69.8%)</b><br>[59.6% to 78.8%] | <b>67 (69.8%)</b><br>[59.6% to 78.8%] | <b>80 (83.3%)</b><br>[74.4%- 90.2%]   |
| Specificity                      |           | No. of negative patients              |                                       |                                       |                                       |                                       |                                       |                                       |                                       |
| Neg. RT-PCR†                     | 105       | 102 (97.1%)                           | 104 (99.1%)                           | 104 (99.1%)                           | 102 (97.1%)                           | 99 (94.3%)                            | 104 (99.1%)                           | 104 (99.1%)                           | 105 (100%)                            |
| [95%CI]                          |           | [91.9% to 99.4%]                      | [94.8% to 100%]                       | [94.8% to 100%]                       | [91.9% to 99.4%]                      | [88.0% to 97.9%]                      | [94.8% to 100%]                       | [94.8% to 100%]                       | [96.6% to 100%]                       |
| Neg. RT-PCR                      | 92        | 91 (98.9%)                            | 92 (100%)                             | 92 (100%)                             | 90 (97.8%)                            | 89 (96.7%)                            | 92 (100%)                             | 92 (100%)                             | 92 (100%)                             |
| [95%CI]                          |           | [94.1% to 99.9%]                      | [96.1%-100%]                          | [96.1%-100%]                          | [92.4%-99.7%]                         | [90.8%-99.3%]                         | [96.1%-100%]                          | [96.1%-100%]                          | [96.1%-100%]                          |

**Supplemental Table 3:** Positive predictive values (PPV), negative predictive values (NPV) and accuracies were simulated at different disease prevalence to estimate the performance of the antigenic tests in « real-life » conditions. Ct value > 33 was not considered a true positive case. \*As the sensitivity and the specificity were 100% both, no confidence intervals have been calculated for the PPV and the NPV.

|                 |                   | Disease prevalence     |                        |                        |                         |                        |                        |
|-----------------|-------------------|------------------------|------------------------|------------------------|-------------------------|------------------------|------------------------|
|                 |                   | 2%                     | 5%                     | 10%                    | 15%                     | 20%                    | 25%                    |
| <b>PPV</b>      | Biotical [95% CI] | 29.6% [13.8% to 52.6%] | 52.0% [29.1% to 74.1%] | 69.6% [46.5% to 85.8%] | 78.4% [58.0% to 90.6%]  | 83.7% [66.1% to 93.1%] | 87.3% [72.2% to 94.8%] |
|                 | Panbio [95% CI]   | 63.8% [20.0% to 92.6%] | 82.0% [39.2% to 97.0%] | 90.6% [57.6% to 98.6%] | 94.9% [68.4% to 99.1%]  | 95.6% [75.4% to 99.4%] | 96.6% [80.3% to 99.5%] |
|                 | Healgen [95% CI]  | 24.6% [13.0% to 41.6%] | 45.7% [27.8% to 64.8%] | 64.0% [44.8% to 79.5%] | 73.82% [56.3% to 86.0%] | 80.0% [64.6% to 89.7%] | 84.2% [70.9% to 92.1%] |
|                 | Roche [95% CI]    | 64.5% [20.5% to 92.8%] | 82.4% [39.9% to 97.1%] | 90.8% [58.4% to 98.6%] | 94.02% [69.0% to 99.1%] | 95.7% [76.0% to 99.4%] | 96.7% [80.8% to 99.5%] |
|                 | Ortho [95% CI]    | 100% [N/A]*            | 100% [N/A]*            | 100% [N/A]*            | 100% [N/A]*             | 100% [N/A]*            | 100% [N/A]*            |
| <b>NPV</b>      | Biotical [95% CI] | 99.5% [99.3% to 99.7%] | 98.7% [98.1% to 99.1%] | 97.3% [96.1% to 98.2%] | 95.8% [93.9% to 97.2%]  | 94.2% [91.6% to 96.0%] | 92.4% [89.1% to 94.8%] |
|                 | Panbio [95% CI]   | 99.6% [99.4% to 99.7%] | 99.0% [98.4% to 99.3%] | 97.8% [96.6% to 98.6%] | 96.6% [94.8% to 97.8%]  | 95.2% [92.7% to 96.9%] | 93.7% [90.6% to 95.8%] |
|                 | Healgen [95% CI]  | 99.8% [99.6% to 99.9%] | 99.4% [98.9% to 99.7%] | 98.7% [97.6% to 99.3%] | 97.9% [96.3% to 98.9%]  | 97.1% [94.8% to 98.4%] | 96.2% [93.1% to 97.9%] |
|                 | Roche [95% CI]    | 99.6% [99.4% to 99.8%] | 99.1% [98.5% to 99.4%] | 98.1% [96.9% to 98.8%] | 97.0% [95.2% to 98.1%]  | 95.8% [93.4% to 97.3%] | 94.4% [91.3% to 96.5%] |
|                 | Ortho [95% CI]    | 100% [N/A]*            | 100% [N/A]*            | 100% [N/A]*            | 100% [N/A]*             | 100% [N/A]*            | 100% [N/A]*            |
| <b>Accuracy</b> | Biotical [95% CI] | 95.9% [92.0% to 98.2%] | 95.3% [91.2% to 97.8%] | 94.2% [90.0% to 97.2%] | 93.3% [88.7% to 96.4%]  | 92.2% [87.5% to 95.7%] | 91.3% [86.3% to 94.9%] |
|                 | Panbio [95% CI]   | 98.7% [95.8% to 99.8%] | 98.1% [95.0% to 99.5%] | 97.2% [93.7% to 99.0%] | 96.2% [92.4% to 98.5%]  | 95.3% [91.2% to 97.8%] | 94.3% [90.0% to 97.2%] |
|                 | Healgen [95% CI]  | 94.3% [90.0% to 97.2%] | 94.2% [89.8% to 97.1%] | 93.9% [89.4% to 96.9%] | 93.6% [89.1% to 96.6%]  | 93.3% [88.7% to 96.4%] | 93.0% [88.4% to 96.2%] |
|                 | Roche [95% CI]    | 98.7% [95.9% to 99.8%] | 98.3% [95.2% to 99.6%] | 97.4% [94.0% to 99.2%] | 96.6% [92.9% to 98.7%]  | 95.8% [91.8% to 98.2%] | 94.9% [90.8% to 97.6%] |
|                 | Ortho [95% CI]    | 100% [98.1% to 100%]   | 100% [98.1% to 100%]   | 100% [98.1% to 100%]   | 100% [98.1% to 100%]    | 100% [98.1% to 100%]   | 100% [98.1% to 100%]   |
